# Supplementary material for: Europium-doped NaGd(WO4)2 nanophosphors: synthesis, luminescence and their coating with fluorescein for pH sensing
Source: Royal Society of Chemistry journal article supplement (doi:10.1039/c7dt01986f), 2017-01-01
Supplement: c7dt01986f1.pdf [file c7dt01986f1.pdf]

## Supporting information

# **Europium-doped NaGd(WO<sub>4</sub>)<sub>2</sub> nanophosphors: synthesis, luminescence and their coating with fluorescein for pH sensing**

Mariano Laguna, Alberto Escudero, Nuria O. Nuñez, Ana I. Becerro and Manuel Ocaña\*

*Instituto de Ciencia de Materiales de Sevilla, CSIC, Américo Vespucio 49, 41092, Isla de la Cartuja,  
Sevilla, Spain*

Estimation of the amount of fluorescein on the NP surface

Table S1: Data from the TG analysis of the citrate capped  $\text{Eu}^{3+}(6\%):\text{NaGd}(\text{WO}_4)_2$  sample coated PAH-fluorescein.

| Sample            | Initial<br>(RT) |     | Adsorbed water<br>(up to 200 °C) |     | Citrate + PAH-F<br>(200 – 500 °C) |     | Final<br>(750 °C) |      |
|-------------------|-----------------|-----|----------------------------------|-----|-----------------------------------|-----|-------------------|------|
|                   | Mg              | %   | mg                               | %   | mg                                | %   | mg                | %    |
| NPs@cit<br>@PAH-F | 2.629           | 100 | 0.115                            | 4.5 | 0.163                             | 6.4 | 2.349             | 89.1 |

In the data shown in Fig. 7 the final weight value at 750 °C for the PAH-fluorescein coated NPs was 2.349 mg, which corresponded to 89.1 % of the initial weight. We assume that at this temperature only NP cores are present. For a spherical NP with core diameter  $d_c = 119$  nm, the volume is  $V_c = (4\pi/3) \cdot (59.5 \text{ nm})^3 \approx 882.3 \cdot 10^3 \text{ nm}^3$ . Given the bulk density of  $\text{NaGd}(\text{WO}_4)_2 = 7.18 \text{ g/cm}^3$ , the mass of one  $\text{NaGd}(\text{WO}_4)_2$  core thus is  $m_c = 7.18 \text{ g/cm}^3 \cdot 882.3 \cdot 10^3 \text{ nm}^3 \approx 6.33 \cdot 10^6 \text{ g} \cdot (10^{-9} \text{ m}/10^{-2} \text{ m})^3 = 6.33 \cdot 10^{-15} \text{ g}$ . The number of NPs can be thus calculated:

$$2.349 \cdot 10^{-3} \text{ g} \cdot \frac{1 \text{ NP}}{6.33 \cdot 10^{-15} \text{ g}} = 3.71 \cdot 10^{11} \text{ NPs}$$

By comparing the TG data with the as synthesized NPs (i.e. citrate capped NPs, in which a 4.8 % weight loss was observed between 200 and 500 °C), the amount of PAH-fluorescein is estimated to be 1.6 % (6.4 – 4.8 weight %), in this case 0.0421 mg. The proportion poly(allylamine hydrochloride) : fluorescein isothiocyanate is 50:1, meaning that every 3239.4 mg of PAH-fluorescein (50 mmol of PAH monomers · 57 mg/mmol + 1 mmol of fluorescein isothiocyanate · 389.4 mg/mmol ) contain 389.4 mg of fluorescein isothiocyanate, then:

$$0.0421 \text{ mg PAH - fluorescein} \cdot \frac{389.4 \text{ mg fluorescein}}{3239.4 \text{ mg PAH - fluorescein}} \cdot \frac{1 \text{ mmol fluorescein}}{389.4 \text{ mg}} = 1.30 \cdot 10^{-8} \text{ mol fluorescein}$$

Such amount of fluorescein is associated with  $3.71 \cdot 10^{11}$  NPs, then:

$$\frac{\text{mol fluorescein}}{NP} = \frac{1.30 \cdot 10^{-8}}{3.71 \cdot 10^{11}} = 3.51 \cdot 10^{-20} \text{ mol fluorescein per NP}$$

$$3.51 \cdot 10^{-20} \frac{\text{mol fluorescein}}{NP} \cdot \frac{6.023 \cdot 10^{23} \text{ molecules}}{\text{mol}} \approx 21100 \text{ molecules of fluorescein per NP}$$
